# Supplementary material for: Exploring the Interaction between the SWI/SNF Chromatin Remodeling Complex and the Zinc Finger Factor CTCF
Source: MDPI journal article supplement (doi:10.3390/ijms21238950), 2020-11-25
Supplement: s1 [file s1]

## Supporting Information

### Exploring the interaction between the SWI/SNF chromatin remodeling complex and the zinc finger factor CTCF

Mariangela Valletta<sup>1#</sup>, Rosita Russo<sup>1#</sup>, Ilaria Baglivo<sup>1</sup>, Veronica Russo<sup>1</sup>, Sara Ragucci<sup>1</sup>, Annamaria Sandomenico<sup>2</sup>, Emanuela Iaccarino<sup>2</sup>, Menotti Ruvo<sup>2</sup>, Italia De Feis<sup>3</sup>, Claudia Angelini<sup>3</sup>, Sara Iachettini<sup>4</sup>, Annamaria Biroccio<sup>4</sup>, Paolo Vincenzo Pedone<sup>1\*</sup> and Angela Chambery<sup>1\*</sup>

<sup>1</sup>Department of Environmental, Biological and Pharmaceutical Sciences and Technologies, University of Campania “Luigi Vanvitelli”, 81100 Caserta, Italy

<sup>2</sup>Istituto di Biostrutture e Bioimmagini IBB, National Research Council, Via Mezzocannone 16, 80134 Napoli, Italy

<sup>3</sup>Istituto per le applicazioni del calcolo IAC ‘M. Picone’, National Research Council, Via Pietro Castellino 111, 80131, Napoli, Italy

<sup>4</sup>Oncogenomic and Epigenetic Unit, IRCCS-Regina Elena National Cancer Institute, Via Elio Chianesi 53, 00144 Roma, Italy

Running title: *CTCF interacts with the SWI/SNF complex*

\*To whom correspondence should be addressed: Paolo Vincenzo Pedone and Angela Chambery: Department of Environmental, Biological and Pharmaceutical Sciences and Technologies, University of Campania “Luigi Vanvitelli”, 81100 Caserta, Italy; [paolovincenzo.pedone@unicampania.it](mailto:paolovincenzo.pedone@unicampania.it); Tel. (+39) 0823275150  
[angela.chambery@unicampania.it](mailto:angela.chambery@unicampania.it); Tel. (+39) 0823274583

<sup>#</sup>M.V. and R.R. contributed equally to this work.

**Table S1.** Identification details of the SWI/SNF remodeling complex subunits identified by nano-LC-MS/MS by searching the custom SWI/SNF database in triplicate injections of A) Benzonase-treated and B) untreated samples. PSM, peptide-to-spectra matches.

**A**

| Accession | Description                                                                                   | Gene names     | # AAs | MW [kDa] | calc. pI | Benzonase (inj #1) |            |        |                   |                  |                       | Benzonase (inj #2) |            |        |                   |                  |                       | Benzonase (inj #3) |            |        |                   |                  |                       |
|-----------|-----------------------------------------------------------------------------------------------|----------------|-------|----------|----------|--------------------|------------|--------|-------------------|------------------|-----------------------|--------------------|------------|--------|-------------------|------------------|-----------------------|--------------------|------------|--------|-------------------|------------------|-----------------------|
|           |                                                                                               |                |       |          |          | Coverage           | # Peptides | # PSMs | # Unique Peptides | Score Sequest HT | # Peptides Sequest HT | Coverage           | # Peptides | # PSMs | # Unique Peptides | Score Sequest HT | # Peptides Sequest HT | Coverage           | # Peptides | # PSMs | # Unique Peptides | Score Sequest HT | # Peptides Sequest HT |
| Q14497    | AT-rich interactive domain-containing protein 1A                                              | BAF250A/ARID1A | 2285  | 241.892  | 6.70     | 19                 | 30         | 53     | 30                | 153              | 30                    | 19                 | 28         | 50     | 28                | 156              | 28                    | 24                 | 40         | 69     | 40                | 171              | 40                    |
| P51532    | Transcription activator BRG1                                                                  | BRG1/SMARCA4   | 1647  | 184.53   | 7.88     | 19                 | 29         | 44     | 29                | 118              | 29                    | 16                 | 23         | 38     | 23                | 114              | 23                    | 24                 | 39         | 60     | 39                | 135              | 39                    |
| Q92922    | SWI/SNF complex subunit SMARCC1                                                               | BAF155/SMARCC1 | 1105  | 122.79   | 5.76     | 21                 | 18         | 32     | 12                | 87               | 18                    | 22                 | 18         | 33     | 13                | 97               | 18                    | 20                 | 21         | 44     | 14                | 102              | 21                    |
| Q8TAQ2    | SWI/SNF complex subunit SMARCC2                                                               | BAF170/SMARCC2 | 1214  | 132.797  | 5.69     | 17                 | 17         | 22     | 11                | 48               | 17                    | 12                 | 10         | 18     | 5                 | 48               | 10                    | 20                 | 22         | 35     | 15                | 59               | 22                    |
| Q969G3    | SWI/SNF-related matrix-associated actin-dependent regulator of chromatin subfamily E member 1 | BAF57/SMARCE1  | 411   | 46.621   | 4.88     | 33                 | 11         | 16     | 11                | 42               | 11                    | 25                 | 9          | 14     | 9                 | 43               | 9                     | 33                 | 11         | 20     | 11                | 47               | 11                    |
| Q96GM5    | SWI/SNF-related matrix-associated actin-dependent regulator of chromatin subfamily D member 1 | BAF60A/SMARCD1 | 515   | 58.196   | 9.25     | 24                 | 8          | 12     | 8                 | 35               | 8                     | 21                 | 6          | 9      | 6                 | 30               | 6                     | 29                 | 12         | 17     | 10                | 37               | 12                    |
| Q92785    | Zinc finger protein ubi-d4                                                                    | BAF45D/DPF2    | 391   | 44.127   | 6.33     | 46                 | 10         | 13     | 10                | 34               | 10                    | 37                 | 8          | 11     | 8                 | 34               | 8                     | 49                 | 13         | 22     | 13                | 34               | 13                    |
| Q12824    | SWI/SNF-related matrix-associated actin-dependent regulator of chromatin subfamily B member 1 | BAF47/SMARCB1  | 385   | 44.113   | 6.23     | 22                 | 7          | 9      | 7                 | 20               | 7                     | 19                 | 6          | 7      | 6                 | 18               | 6                     | 19                 | 6          | 10     | 6                 | 23               | 6                     |
| Q96019    | Actin-like protein 6A                                                                         | BAF53A/ACTLA   | 429   | 47.43    | 5.60     | 17                 | 4          | 7      | 4                 | 20               | 4                     | 17                 | 4          | 6      | 4                 | 20               | 4                     | 17                 | 4          | 7      | 4                 | 20               | 4                     |
| Q15532    | Protein SSXT                                                                                  | SS18           | 418   | 45.899   | 6.46     | 3                  | 2          | 5      | 2                 | 11               | 2                     | 3                  | 1          | 2      | 1                 | 5                | 1                     | 7                  | 3          | 6      | 3                 | 11               | 3                     |
| Q8NFD5    | AT-rich interactive domain-containing protein 1B                                              | BAF250B/ARID1B | 2236  | 235.974  | 6.73     | 1                  | 2          | 2      | 2                 | 2                | 2                     | -                  | -          | -      | -                 | -                | -                     | 1                  | 2          | 2      | 2                 | 2                | 2                     |
| Q9NPI1    | Bromodomain-containing protein 7                                                              | BRD7           | 651   | 74.092   | 6.39     | 5                  | 1          | 4      | 1                 | 0                | 1                     | -                  | -          | -      | -                 | -                | -                     | -                  | -          | -      | -                 | -                | -                     |
| P60709    | Actin, cytoplasmic 1                                                                          | β-actin/ACTB   | 375   | 41.71    | 5.48     | 54                 | 19         | 75     | 19                | 203              | 19                    | 50                 | 16         | 63     | 16                | 191              | 16                    | 54                 | 21         | 96     | 21                | 225              | 21                    |
| Q9H8M2    | Bromodomain-containing protein 9                                                              | BRD9           | 597   | 66.958   | 6.19     | -                  | -          | -      | -                 | -                | -                     | -                  | -          | -      | -                 | -                | -                     | 2                  | 1          | 1      | 1                 | 0                | 1                     |

**B**

| Accession | Description                                                                                   | Gene names     | # AAs | MW [kDa] | calc. pI | Untreated (inj #1) |            |        |                   |                  |                       | Untreated (inj #2) |            |        |                   |                  |                       | Untreated (inj #3) |            |        |                   |                  |                       |
|-----------|-----------------------------------------------------------------------------------------------|----------------|-------|----------|----------|--------------------|------------|--------|-------------------|------------------|-----------------------|--------------------|------------|--------|-------------------|------------------|-----------------------|--------------------|------------|--------|-------------------|------------------|-----------------------|
|           |                                                                                               |                |       |          |          | Coverage           | # Peptides | # PSMs | # Unique Peptides | Score Sequest HT | # Peptides Sequest HT | Coverage           | # Peptides | # PSMs | # Unique Peptides | Score Sequest HT | # Peptides Sequest HT | Coverage           | # Peptides | # PSMs | # Unique Peptides | Score Sequest HT | # Peptides Sequest HT |
| Q14497    | AT-rich interactive domain-containing protein 1A                                              | BAF250A/ARID1A | 2285  | 241.892  | 6.70     | 17                 | 24         | 43     | 24                | 136              | 24                    | 18                 | 27         | 47     | 27                | 145              | 27                    | 21                 | 37         | 61     | 36                | 161              | 37                    |
| P51532    | Transcription activator BRG1                                                                  | BRG1/SMARCA4   | 1647  | 184.53   | 7.88     | 18                 | 24         | 36     | 24                | 108              | 24                    | 19                 | 26         | 42     | 26                | 125              | 26                    | 22                 | 38         | 65     | 38                | 149              | 38                    |
| Q92922    | SWI/SNF complex subunit SMARCC1                                                               | BAF155/SMARCC1 | 1105  | 122.79   | 5.76     | 19                 | 16         | 22     | 12                | 67               | 16                    | 21                 | 20         | 26     | 15                | 78               | 20                    | 28                 | 26         | 40     | 19                | 89               | 26                    |
| Q8TAQ2    | SWI/SNF complex subunit SMARCC2                                                               | BAF170/SMARCC2 | 1214  | 132.797  | 5.69     | 13                 | 10         | 12     | 6                 | 34               | 10                    | 16                 | 13         | 16     | 8                 | 43               | 13                    | 21                 | 22         | 30     | 15                | 48               | 22                    |
| Q969G3    | SWI/SNF-related matrix-associated actin-dependent regulator of chromatin subfamily E member 1 | BAF57/SMARCE1  | 411   | 46.621   | 4.88     | 21                 | 8          | 13     | 8                 | 40               | 8                     | 21                 | 10         | 17     | 10                | 49               | 10                    | 29                 | 13         | 21     | 13                | 55               | 13                    |
| Q96GM5    | SWI/SNF-related matrix-associated actin-dependent regulator of chromatin subfamily D member 1 | BAF60A/SMARCD1 | 515   | 58.196   | 9.25     | 14                 | 7          | 10     | 7                 | 34               | 7                     | 14                 | 7          | 11     | 7                 | 36               | 7                     | 27                 | 16         | 23     | 12                | 44               | 16                    |
| Q92785    | Zinc finger protein ubi-d4                                                                    | BAF45D/DPF2    | 391   | 44.127   | 6.33     | 39                 | 8          | 12     | 8                 | 42               | 8                     | 43                 | 10         | 14     | 10                | 46               | 10                    | 47                 | 13         | 20     | 13                | 48               | 13                    |
| Q12824    | SWI/SNF-related matrix-associated actin-dependent regulator of chromatin subfamily B member 1 | BAF47/SMARCB1  | 385   | 44.113   | 6.23     | 29                 | 7          | 9      | 7                 | 27               | 7                     | 34                 | 9          | 11     | 9                 | 32               | 9                     | 34                 | 10         | 14     | 10                | 34               | 10                    |
| Q96019    | Actin-like protein 6A                                                                         | BAF53A/ACTLA   | 429   | 47.43    | 5.60     | 14                 | 3          | 5      | 3                 | 17               | 3                     | 23                 | 6          | 8      | 6                 | 23               | 6                     | 23                 | 6          | 9      | 6                 | 26               | 6                     |
| Q15532    | Protein SSXT                                                                                  | SS18           | 418   | 45.899   | 6.46     | 7                  | 2          | 2      | 2                 | 6                | 2                     | 7                  | 2          | 2      | 2                 | 6                | 2                     | 7                  | 3          | 4      | 3                 | 9                | 3                     |
| Q8NFD5    | AT-rich interactive domain-containing protein 1B                                              | BAF250B/ARID1B | 2236  | 235.974  | 6.73     | -                  | -          | -      | -                 | -                | -                     | -                  | -          | -      | -                 | -                | -                     | 2                  | 3          | 3      | 2                 | 5                | 3                     |
| Q9NPI1    | Bromodomain-containing protein 7                                                              | BRD7           | 651   | 74.092   | 6.39     | 5                  | 1          | 4      | 1                 | 0                | 1                     | 5                  | 1          | 1      | 1                 | 0                | 1                     | -                  | -          | -      | -                 | -                | -                     |
| P60709    | Actin, cytoplasmic 1                                                                          | β-actin/ACTB   | 375   | 41.71    | 5.48     | 35                 | 8          | 20     | 8                 | 63               | 8                     | 44                 | 12         | 31     | 12                | 87               | 12                    | 54                 | 17         | 47     | 17                | 95               | 17                    |
| Q9H8M2    | Bromodomain-containing protein 9                                                              | BRD9           | 597   | 66.958   | 6.19     | 8                  | 3          | 3      | 3                 | 7                | 3                     | 8                  | 3          | 3      | 3                 | 7                | 3                     | 11                 | 4          | 4      | 4                 | 7                | 4                     |

**Table S2.** Identification details of the SWI/SNF remodeling complex subunits identified by nano-LC-MS/MS by searching the Homo sapiens UniProtKB/Swiss-Prot database in triplicate injections of A) Benzonase-treated and B) untreated samples. PSM, peptide-to-spectra matches.

**A**

| Accession | Description                                                                                   | Gene names     | # AAs | MW [kDa] | calc. pI | Benzonase (inj #1) |            |        |                   |                  |                       | Benzonase (inj #2) |            |        |                   |                  |                       | Benzonase (inj #3) |            |        |                   |                  |                       |
|-----------|-----------------------------------------------------------------------------------------------|----------------|-------|----------|----------|--------------------|------------|--------|-------------------|------------------|-----------------------|--------------------|------------|--------|-------------------|------------------|-----------------------|--------------------|------------|--------|-------------------|------------------|-----------------------|
|           |                                                                                               |                |       |          |          | Coverage           | # Peptides | # PSMs | # Unique Peptides | Score Sequest HT | # Peptides Sequest HT | Coverage           | # Peptides | # PSMs | # Unique Peptides | Score Sequest HT | # Peptides Sequest HT | Coverage           | # Peptides | # PSMs | # Unique Peptides | Score Sequest HT | # Peptides Sequest HT |
| Q14497    | AT-rich interactive domain-containing protein 1A                                              | BAF250A/ARID1A | 2285  | 241.892  | 6.70     | 20                 | 31         | 56     | 31                | 166              | 31                    | 19                 | 28         | 50     | 28                | 156              | 28                    | 26                 | 41         | 70     | 40                | 174              | 41                    |
| P51532    | Transcription activator BRG1                                                                  | BRG1/SMARCA4   | 1647  | 184.53   | 7.88     | 18                 | 29         | 45     | 29                | 127              | 29                    | 16                 | 23         | 38     | 23                | 114              | 23                    | 23                 | 37         | 58     | 37                | 136              | 37                    |
| Q92922    | SWI/SNF complex subunit SMARCC1                                                               | BAF155/SMARCC1 | 1105  | 122.79   | 5.76     | 24                 | 21         | 38     | 15                | 108              | 21                    | 22                 | 18         | 33     | 13                | 97               | 18                    | 26                 | 23         | 45     | 16                | 106              | 23                    |
| Q8TAQ2    | SWI/SNF complex subunit SMARCC2                                                               | BAF170/SMARCC2 | 1214  | 132.797  | 5.69     | 14                 | 13         | 21     | 7                 | 54               | 13                    | 12                 | 10         | 18     | 5                 | 48               | 10                    | 22                 | 22         | 35     | 15                | 59               | 22                    |
| Q969G3    | SWI/SNF-related matrix-associated actin-dependent regulator of chromatin subfamily E member 1 | BAF57/SMARCE1  | 411   | 46.621   | 4.88     | 31                 | 10         | 17     | 10                | 47               | 10                    | 25                 | 9          | 14     | 9                 | 43               | 9                     | 33                 | 11         | 20     | 11                | 47               | 11                    |
| Q96GM5    | SWI/SNF-related matrix-associated actin-dependent regulator of chromatin subfamily D member 1 | BAF60A/SMARCD1 | 515   | 58.196   | 9.25     | 23                 | 8          | 11     | 8                 | 34               | 8                     | 21                 | 6          | 9      | 6                 | 30               | 6                     | 29                 | 12         | 17     | 10                | 37               | 12                    |
| Q92785    | Zinc finger protein ubi-d4                                                                    | BAF45D/DPF2    | 391   | 44.127   | 6.33     | 37                 | 8          | 11     | 8                 | 34               | 8                     | 37                 | 8          | 11     | 8                 | 34               | 8                     | 49                 | 13         | 22     | 13                | 34               | 13                    |
| Q12824    | SWI/SNF-related matrix-associated actin-dependent regulator of chromatin subfamily B member 1 | BAF47/SMARCB1  | 385   | 44.113   | 6.23     | 22                 | 7          | 10     | 7                 | 24               | 7                     | 19                 | 6          | 7      | 6                 | 18               | 6                     | 25                 | 7          | 11     | 7                 | 23               | 7                     |
| Q96019    | Actin-like protein 6A                                                                         | BAF53A/ACTLA   | 429   | 47.43    | 5.60     | 17                 | 4          | 7      | 4                 | 20               | 4                     | 17                 | 4          | 6      | 4                 | 20               | 4                     | 17                 | 4          | 7      | 4                 | 20               | 4                     |
| Q15532    | Protein SSXT                                                                                  | SS18           | 418   | 45.899   | 6.46     | 3                  | 2          | 3      | 2                 | 7                | 2                     | 3                  | 1          | 2      | 1                 | 5                | 1                     | 7                  | 3          | 6      | 3                 | 11               | 3                     |
| Q8NFD5    | AT-rich interactive domain-containing protein 1B                                              | BAF250B/ARID1B | 2236  | 235.974  | 6.73     | 1                  | 1          | 1      | 1                 | 2                | 1                     | -                  | -          | -      | -                 | -                | -                     | 2                  | 3          | 3      | 2                 | 2                | 3                     |
| Q9NPI1    | Bromodomain-containing protein 7                                                              | BRD7           | 651   | 74.092   | 6.39     | -                  | -          | -      | -                 | -                | -                     | -                  | -          | -      | -                 | -                | -                     | -                  | -          | -      | -                 | -                | -                     |
| P60709    | Actin, cytoplasmic 1                                                                          | β-actin/ACTB   | 375   | 41.71    | 5.48     | 52                 | 18         | 75     | 7                 | 212              | 18                    | 50                 | 16         | 63     | 6                 | 191              | 16                    | 54                 | 21         | 95     | 8                 | 225              | 21                    |
| Q9HBM2    | Bromodomain-containing protein 9                                                              | BRD9           | 597   | 66.958   | 6.19     | -                  | -          | -      | -                 | -                | -                     | -                  | -          | -      | -                 | -                | -                     | 2                  | 1          | 1      | 1                 | 0                | 1                     |

**B**

| Accession | Description                                                                                   | Gene names     | # AAs | MW [kDa] | calc. pI | Untreated (inj #1) |            |        |                   |                  |                       | Untreated (inj #2) |            |        |                   |                  |                       | Untreated (inj #3) |            |        |                   |                  |                       |
|-----------|-----------------------------------------------------------------------------------------------|----------------|-------|----------|----------|--------------------|------------|--------|-------------------|------------------|-----------------------|--------------------|------------|--------|-------------------|------------------|-----------------------|--------------------|------------|--------|-------------------|------------------|-----------------------|
|           |                                                                                               |                |       |          |          | Coverage           | # Peptides | # PSMs | # Unique Peptides | Score Sequest HT | # Peptides Sequest HT | Coverage           | # Peptides | # PSMs | # Unique Peptides | Score Sequest HT | # Peptides Sequest HT | Coverage           | # Peptides | # PSMs | # Unique Peptides | Score Sequest HT | # Peptides Sequest HT |
| Q14497    | AT-rich interactive domain-containing protein 1A                                              | BAF250A/ARID1A | 2285  | 241.892  | 6.70     | 19                 | 31         | 52     | 30                | 155              | 31                    | 18                 | 27         | 47     | 27                | 145              | 27                    | 21                 | 36         | 59     | 35                | 161              | 36                    |
| P51532    | Transcription activator BRG1                                                                  | BRG1/SMARCA4   | 1647  | 184.53   | 7.88     | 22                 | 31         | 53     | 31                | 146              | 31                    | 19                 | 26         | 42     | 26                | 125              | 26                    | 24                 | 39         | 63     | 24                | 150              | 39                    |
| Q92922    | SWI/SNF complex subunit SMARCC1                                                               | BAF155/SMARCC1 | 1105  | 122.79   | 5.76     | 24                 | 22         | 30     | 16                | 85               | 22                    | 21                 | 20         | 26     | 15                | 78               | 20                    | 26                 | 25         | 39     | 18                | 89               | 25                    |
| Q8TAQ2    | SWI/SNF complex subunit SMARCC2                                                               | BAF170/SMARCC2 | 1214  | 132.797  | 5.69     | 18                 | 15         | 19     | 9                 | 48               | 15                    | 16                 | 13         | 16     | 8                 | 43               | 13                    | 23                 | 23         | 32     | 16                | 50               | 23                    |
| Q969G3    | SWI/SNF-related matrix-associated actin-dependent regulator of chromatin subfamily E member 1 | BAF57/SMARCE1  | 411   | 46.621   | 4.88     | 21                 | 10         | 18     | 10                | 52               | 10                    | 21                 | 10         | 17     | 10                | 49               | 10                    | 29                 | 13         | 21     | 13                | 55               | 13                    |
| Q96GM5    | SWI/SNF-related matrix-associated actin-dependent regulator of chromatin subfamily D member 1 | BAF60A/SMARCD1 | 515   | 58.196   | 9.25     | 16                 | 9          | 14     | 9                 | 42               | 9                     | 14                 | 7          | 11     | 7                 | 36               | 7                     | 26                 | 14         | 22     | 11                | 45               | 14                    |
| Q92785    | Zinc finger protein ubi-d4                                                                    | BAF45D/DPF2    | 391   | 44.127   | 6.33     | 43                 | 10         | 15     | 10                | 48               | 10                    | 43                 | 10         | 14     | 10                | 46               | 10                    | 50                 | 14         | 21     | 14                | 48               | 14                    |
| Q12824    | SWI/SNF-related matrix-associated actin-dependent regulator of chromatin subfamily B member 1 | BAF47/SMARCB1  | 385   | 44.113   | 6.23     | 34                 | 9          | 11     | 9                 | 32               | 9                     | 34                 | 9          | 11     | 9                 | 32               | 9                     | 34                 | 10         | 14     | 10                | 34               | 10                    |
| Q96019    | Actin-like protein 6A                                                                         | BAF53A/ACTLA   | 429   | 47.43    | 5.60     | 23                 | 6          | 8      | 6                 | 23               | 6                     | 23                 | 6          | 8      | 6                 | 23               | 6                     | 23                 | 6          | 9      | 6                 | 26               | 6                     |
| Q15532    | Protein SSXT                                                                                  | SS18           | 418   | 45.899   | 6.46     | 7                  | 2          | 2      | 2                 | 6                | 2                     | 7                  | 2          | 2      | 2                 | 6                | 2                     | 7                  | 3          | 4      | 3                 | 9                | 3                     |
| Q8NFD5    | AT-rich interactive domain-containing protein 1B                                              | BAF250B/ARID1B | 2236  | 235.974  | 6.73     | 1                  | 2          | 2      | 1                 | 5                | 2                     | -                  | -          | -      | -                 | -                | -                     | 2                  | 3          | 3      | 2                 | 5                | 3                     |
| Q9NPI1    | Bromodomain-containing protein 7                                                              | BRD7           | 651   | 74.092   | 6.39     | 5                  | 1          | 4      | 1                 | 0                | 1                     | -                  | -          | -      | -                 | -                | -                     | -                  | -          | -      | -                 | -                | -                     |
| P60709    | Actin, cytoplasmic 1                                                                          | β-actin/ACTB   | 375   | 41.71    | 5.48     | 46                 | 13         | 34     | 5                 | 93               | 13                    | 44                 | 12         | 31     | 5                 | 87               | 12                    | 52                 | 16         | 44     | 5                 | 95               | 16                    |
| Q9HBM2    | Bromodomain-containing protein 9                                                              | BRD9           | 597   | 66.958   | 6.19     | 8                  | 3          | 3      | 3                 | 7                | 3                     | 8                  | 3          | 3      | 3                 | 7                | 3                     | 11                 | 4          | 4      | 4                 | 7                | 4                     |

**Table S3.** Identification details of proteins identified in control IgG IP sample by nano-LC–MS/MS.

| Accession | Description                                                                               | Gene names | # AAs | MW [kDa] | calc. pI | Coverage | # Peptides | # PSMs | # Unique Peptides | Score Sequest HT | # Peptides Sequest HT |
|-----------|-------------------------------------------------------------------------------------------|------------|-------|----------|----------|----------|------------|--------|-------------------|------------------|-----------------------|
| P35527    | Keratin, type I cytoskeletal 9 OS=Homo sapiens GN=KRT9 PE=1 SV=3                          | KRT9       | 623   | 62.027   | 5.24     | 60       | 25         | 57     | 25                | 220              | 25                    |
| P13645    | Keratin, type I cytoskeletal 10 OS=Homo sapiens GN=KRT10 PE=1 SV=6                        | KRT10      | 584   | 58.792   | 5.21     | 34       | 16         | 42     | 15                | 156              | 16                    |
| P04264    | Keratin, type II cytoskeletal 1 OS=Homo sapiens GN=KRT1 PE=1 SV=6                         | KRT1       | 644   | 65.999   | 8.12     | 36       | 19         | 42     | 17                | 139              | 19                    |
| P00760    | Cationic trypsin OS=Bos taurus PE=1 SV=3                                                  | PRSS1      | 246   | 25.769   | 8.07     | 21       | 3          | 24     | 3                 | 114              | 3                     |
| P35908    | Keratin, type II cytoskeletal 2 epidermal OS=Homo sapiens GN=KRT2 PE=1 SV=2               | KRT2       | 639   | 65.393   | 8        | 25       | 11         | 15     | 10                | 50               | 11                    |
| O14733-2  | Isoform 2 of Dual specificity mitogen-activated protein kinase kinase 7 [OS=Homo sapiens] | MAP2K7     | 462   | 51.848   | 9.22     | 18       | 5          | 9      | 5                 | 36               | 5                     |
| Q5XQN5    | Keratin, type II cytoskeletal 5 OS=Bos taurus GN=KRT5 PE=1 SV=1                           | KRT5       | 601   | 62.898   | 7.81     | 4        | 2          | 4      | 1                 | 13               | 2                     |
| P07477    | Trypsin-1 [OS=Homo sapiens]                                                               | PRSS1      | 247   | 26.541   | 6.51     | 4        | 1          | 3      | 1                 | 8                | 1                     |
| P02533    | Keratin, type I cytoskeletal 14 OS=Homo sapiens GN=KRT14 PE=1 SV=4                        | KRT14      | 472   | 51.529   | 5.16     | 6        | 2          | 2      | 1                 | 7                | 2                     |
| P08779    | Keratin, type I cytoskeletal 16 OS=Homo sapiens GN=KRT16 PE=1 SV=4                        | KRT16      | 473   | 51.236   | 5.05     | 6        | 2          | 2      | 1                 | 7                | 2                     |
| P02768    | Serum albumin OS=Homo sapiens GN=ALB PE=1 SV=2                                            | ALB        | 609   | 69.321   | 6.28     | 7        | 2          | 2      | 2                 | 6                | 2                     |
| Q86YZ3    | Hornerin OS=Homo sapiens GN=HRNR PE=1 SV=2                                                | HRNR       | 2850  | 282.228  | 10.04    | 1        | 2          | 2      | 2                 | 6                | 2                     |
| P01764    | Ig heavy chain V-III region 23 [OS=Homo sapiens]                                          | IGHV3-23   | 117   | 12.574   | 8.28     | 9        | 1          | 2      | 1                 | 6                | 1                     |
| P08263    | Glutathione S-transferase A1 [OS=Homo sapiens]                                            | GSTA1      | 222   | 25.615   | 8.88     | 12       | 1          | 1      | 1                 | 3                | 1                     |
| P35637-1  | RNA-binding protein FUS [OS=Homo sapiens]                                                 | FUS        | 526   | 53.394   | 9.36     | 5        | 1          | 1      | 1                 | 3                | 1                     |
| P38159-1  | RNA-binding motif protein, X chromosome [OS=Homo sapiens]                                 | RBMX       | 391   | 42.306   | 10.05    | 3        | 1          | 1      | 1                 | 3                | 1                     |
| O14920-1  | Inhibitor of nuclear factor kappa-B kinase subunit beta [OS=Homo sapiens]                 | IKBKB      | 756   | 86.509   | 5.78     | 5        | 1          | 2      | 1                 | 0                | 1                     |
| Q12840    | Kinesin heavy chain isoform 5A [OS=Homo sapiens]                                          | KIF5A      | 1032  | 117.306  | 5.9      | 2        | 1          | 1      | 1                 | 0                | 1                     |

**Table S4.** List of ChIP-seq experiments of proteins used in this study.

| Data           | Organism | GEO Accession Number | Cell type | Reference                    |
|----------------|----------|----------------------|-----------|------------------------------|
| CTCF           | Hg18     | GSM325897            | HeLa      | Cuddapah et al., 2009        |
| CTCF           | Hg19     | GSM733785            | HeLa-S3   | ENCODE Accession ENCFF768OPK |
| CTCF           | Hg19     | GSM749739            | HeLa-S3   | ENCODE Accession ENCFF830KSV |
| CTCF           | Hg19     | GSM822285            | HeLa-S3   | ENCODE Accession ENCFF002CSN |
| SMARCA4 (BRG1) | Hg18     | GSM601399            | HeLa-S3   | Euskirchen et al., 2011      |
| SMARCB1        | Hg19     | GSM935635            | HeLa-S3   | ENCODE Accession ENCFF002CSN |
| SMARCC2        | Hg19     | GSM935638            | HeLa-S3   | ENCODE Accession ENCFF002CRU |
| CTCF           | Hg19     | GSM733719            | K562      | ENCODE Accession ENCFF002CEL |
| CTCF           | Hg19     | GSM822311            | K562      | ENCODE Accession ENCFF002DBD |
| CTCF           | Hg19     | GSM935407            | K562      | ENCODE Accession ENCFF738TKN |
| CTCF           | Hg19     | GSM1010820           | K562      | ENCODE Accession ENCFF085HTY |
| CTCF           | Hg19     | GSM749733            | K562      | ENCODE Accession ENCFF002DDJ |
| SMARCA4 (BRG1) | Hg19     | GSE91946             | K562      | ENCODE Accession ENCFF197YHU |
| SMARCA4 (BRG1) | Hg19     | GSE91896             | K562      | ENCODE Accession ENCFF883TOD |
| SMARCB1        | Hg19     | GSM935634            | K562      | ENCODE Accession ENCFF944GJH |
| SMARCC2        | Hg19     | GSE127348            | K562      | ENCODE Accession ENCFF114PTZ |
| ARID2          | Hg19     | GSE105731            | K562      | ENCODE Accession ENCFF332ICQ |
| BRD9           | Hg19     | GSE127486            | K562      | ENCODE Accession ENCFF666LZV |
| DPF2           | Hg19     | GSE92006             | K562      | ENCODE Accession ENCFF823SYE |
| DPF2           | Hg19     | GSE127533            | K562      | ENCODE Accession ENCFF774QKS |

**Table S5.** List of ChIP-seq experiments of histone modifications used in this study.

| Data                          | Organism | GEO Accession Number | Cell type | Reference                    |
|-------------------------------|----------|----------------------|-----------|------------------------------|
| H3K4me1 (Active enhancers)    | Hg19     | GSM733692            | K562      | ENCODE Accession ENCFF721YQO |
| H3K4me1 (Active enhancers)    | Hg19     | GSM788085            | K562      | ENCODE Accession ENCFF564QIG |
| H3K27ac (Active enhancers)    | Hg19     | GSM733656            | K562      | ENCODE Accession ENCFF931VAQ |
| H3K4me3 (Active promoters)    | Hg19     | GSE96303             | K562      | ENCODE Accession ENCFF752ALB |
| H3K4me3 (Active promoters)    | Hg19     | GSM733680            | K562      | ENCODE Accession ENCFF507QPR |
| H3K4me3 (Active promoters)    | Hg19     | GSM788087            | K562      | ENCODE Accession ENCFF258PHY |
| H3K4me3 (Active promoters)    | Hg19     | GSM945165            | K562      | ENCODE Accession ENCFF779FUO |
| H3K36me3 (Gene body)          | Hg19     | GSM733714            | K562      | ENCODE Accession ENCFF784HLI |
| H3K36me3 (Gene body)          | Hg19     | GSM945302            | K562      | ENCODE Accession ENCFF473DJX |
| H3K79me2 (Gene body)          | Hg19     | GSM733653            | K562      | ENCODE Accession ENCFF350GQM |
| H3K9me3 (Inactive enhancers)  | Hg19     | GSM733776            | K562      | ENCODE Accession ENCFF323KXF |
| H3K27me3 (Inactive promoters) | Hg19     | GSM733658            | K562      | ENCODE Accession ENCFF908KJV |
| H3K27me3 (Inactive promoters) | Hg19     | GSM788088            | K562      | ENCODE Accession ENCFF565WMG |

**Table S6.** Number of consensus peaks for each histone marker (A)/proteins (B) in K562 and C) HeLa-S3 cell line.

**A**

| Data     | Cell type | Number of Consensus Peaks |
|----------|-----------|---------------------------|
| H3K4me1  | K562      | 93910                     |
| H3K27ac  | K562      | 84264                     |
| H3K4me3  | K562      | 28962                     |
| H3K36me3 | K562      | 65249                     |
| H3K79me2 | K562      | 106473                    |
| H3K9me3  | K562      | 10847                     |
| H3K27me3 | K562      | 154015                    |

**B**

| Data    | Cell type | Number of Consensus Peaks |
|---------|-----------|---------------------------|
| CTCF    | K562      | 35154                     |
| SMARCA4 | K562      | 17624                     |
| SMARCB1 | K562      | 3079                      |
| SMARCC2 | K562      | 19106                     |
| ARID2   | K562      | 11835                     |
| BRD9    | K562      | 18855                     |
| DPF2    | K562      | 19103                     |

**C**

| Data    | Cell type | Number of Consensus Peaks |
|---------|-----------|---------------------------|
| CTCF    | HeLa-S3   | 17292                     |
| SMARCA4 | HeLa-S3   | 12722                     |
| SMARCB1 | HeLa-S3   | 7780                      |
| SMARCC2 | HeLa-S3   | 2632                      |



**Table S7.** Number of peaks for each factor overlapping CTCF in the K562 and Hela-S3 cell lines. N.a. not available.

| Data    | Peaks Overlapping CTCF ( K562) | Peaks Overlapping CTCF ( HeLa-S3) |
|---------|--------------------------------|-----------------------------------|
| SMARCA4 | 1719                           | 1041                              |
| SMARCB1 | 282                            | 865                               |
| SMARCC2 | 1568                           | 180                               |
| ARID2   | 7153                           | n.a.                              |
| BRD9    | 3626                           | n.a.                              |
| DPF2    | 1260                           | n.a.                              |



**Table S8.** A) Number of regions for active enhancers, active promoters, gene body, inactive enhancers and inactive promoters for the K562 cell line. B) Number of factors peaks overlapping CTCF and the histone markers.

**A**

| Data               | Cell type | Number of regions |
|--------------------|-----------|-------------------|
| Active enhancers   | K562      | 49821             |
| Active Promoters   | K562      | 28821             |
| Gene body          | K562      | 14451             |
| Inactive enhancers | K562      | 10847             |
| Inactive promoters | K562      | 154015            |

**B**

| Data                     | Cell type | Number of Peaks Overlapping Active enhancers | Number of Peaks Overlapping Active Promoters | Number of Peaks Overlapping Gene body | Number of Peaks Overlapping Inactive enhancers | Number of Peaks Overlapping Inactive enhancers |
|--------------------------|-----------|----------------------------------------------|----------------------------------------------|---------------------------------------|------------------------------------------------|------------------------------------------------|
| SMARCA4 overlapping CTCF | K562      | 590                                          | 874                                          | 8                                     | 5                                              | 12                                             |
| ARID2 overlapping CTCF   | K562      | 734                                          | 1049                                         | 35                                    | 16                                             | 76                                             |
| BRD9 overlapping CTCF    | K562      | 1153                                         | 1589                                         | 36                                    | 11                                             | 4                                              |
| DPF2 overlapping CTCF    | K562      | 509                                          | 522                                          | 4                                     | 5                                              | 2                                              |
